# Supplementary material for: Surgical rescue for persistent head and neck cancer after first-line treatment
Source: PubMed Central journal article supplement (PMC7160075; doi:10.1007/s00405-020-05807-0), 2020-01-25
Supplement: 405_2020_5807_MOESM1_ESM.pdf [file 405_2020_5807_MOESM1_ESM.pdf]

**Suppl. 1: Head and Neck Cancer Functional Integrity Scale (HNC-FIT Scale)**

The Head and Neck Cancer Functional Integrity Scale (HNC-FIT Scale) is completed by the physician during the patient interview at regular follow-up visits and serves for internal quality control. It needs normally less than 2 minutes to fill in the questionnaire form. The HNC-FIT Scale covers the functional domains nutrition, respiration, speech, pain, mood, and neck and shoulder mobility. Functional integrity is scaled from 0 to 4, with 0 meaning complete loss of normal function and 4 meaning functional integrity as it was before the disease began.

| Functional domain                                | Integrity Grade                                          |                                                             |                                                           |                                                          |        |
|--------------------------------------------------|----------------------------------------------------------|-------------------------------------------------------------|-----------------------------------------------------------|----------------------------------------------------------|--------|
|                                                  | 0                                                        | 1                                                           | 2                                                         | 3                                                        | 4      |
| <b>Nutrition</b>                                 | Unable to swallow; only via gastrostomy tube             | Gastrostomy tube needed, some oral feeding possible         | No gastrostomy tube, oral diet, but only liquid/soft food | No gastrostomy tube, diet slightly restricted            | normal |
| <b>Respiration</b>                               | Tracheostoma, needs blocked cannula                      | Tracheostoma, speech cannula/no cannula                     | No tracheostoma, breathing difficulties at rest           | No tracheostoma, breathing difficulties only on exertion | normal |
| <b>Speech</b>                                    | Not possible, without phonation                          | Difficult to understand, no phone calls                     | Telephoning possible                                      | Easy to understand, but pronunciation/voice changed      | normal |
| <b>Pain</b>                                      | Pain despite opiate therapy                              | Controlled with opiates                                     | Regularly needs non-opioid analgesics                     | Needs analgesics from time to time                       | normal |
| <b>Mood</b>                                      | Suicidal thoughts                                        | Very depressed despite antidepressants                      | With antidepressants overall normal mood                  | Occasionally depressed, no antidepressants needed        | normal |
| <b>Neck &amp; shoulder mobility<sup>1)</sup></b> | Stiff neck and/or shoulder, hardly any movement possible | Can hair hardly comb, looking backwards in car not possible | Combing with problems, looking backwards in car difficult | Combing and looking backwards in car slightly restricted | normal |

1) The worse result of neck mobility and shoulder mobility is counted
