# Supplementary material for: Surgical rescue for persistent head and neck cancer after first-line treatment
Source: PubMed Central journal article supplement (PMC7160075; doi:10.1007/s00405-020-05807-0), 2020-01-25
Supplement: 405_2020_5807_MOESM2_ESM.pdf [file 405_2020_5807_MOESM2_ESM.pdf]

**Suppl. 2: Absolute and relative number of patients and grade of functional integrity in the 6 functional domains Nutrition, Respiration, Speech, Pain, Mood, and Neck&shoulder mobility.**

|                        |                                                                   | Count | Column N % |
|------------------------|-------------------------------------------------------------------|-------|------------|
| Nutrition              | Unable to swallow; only via gastrostomy tube                      | 3     | 12%        |
|                        | Via gastrostomy tube and oral                                     | 7     | 28%        |
|                        | No gastrostomy tube, oral but only liquid/soft food               | 2     | 8%         |
|                        | No gastrostomy tube, diet slightly restricted                     | 6     | 24%        |
|                        | normal                                                            | 7     | 28%        |
| Respiration            | Tracheostoma, blocked cannula                                     | 0     | 0%         |
|                        | Tracheostoma, speech cannula/no cannula                           | 3     | 12%        |
|                        | No tracheostoma, breathing difficulties at rest                   | 0     | 0%         |
|                        | No tracheostoma, breathing difficulties only on exertion          | 7     | 28%        |
|                        | normal                                                            | 15    | 60%        |
| Speech                 | Not possible, without phonation                                   | 2     | 8%         |
|                        | difficult to understand, no phone calls                           | 1     | 4%         |
|                        | Telephoning possible                                              | 0     | 0%         |
|                        | Easy to understand, but pronunciation/voice changed               | 14    | 56%        |
|                        | normal                                                            | 8     | 32%        |
| Pain                   | Pain despite opiate therapy                                       | 0     | 0%         |
|                        | Controlled with opiates                                           | 3     | 12%        |
|                        | Regularly needs non-opioid analgesics                             | 2     | 8%         |
|                        | Needs analgesics from time to time                                | 5     | 20%        |
|                        | no pain                                                           | 15    | 60%        |
| Mood                   | Suicidal thoughts                                                 | 0     | 0%         |
|                        | Very depressed despite antidepressants                            | 0     | 0%         |
|                        | With antidepressants overall normal mood                          | 2     | 8%         |
|                        | Occasionally depressed mood, no antidepressants needed            | 5     | 20%        |
|                        | normal                                                            | 18    | 72%        |
| Neck&shoulder mobility | Stiff neck, hardly any movement possible                          | 0     | 0%         |
|                        | Can hair hardly comb and/or looking backwards in car not possible | 3     | 12%        |
|                        | Combing with problems and/or looking backwards in car difficult   | 8     | 32%        |
|                        | Combing and/or looking backwards in car slightly restricted       | 8     | 32%        |
|                        | normal                                                            | 6     | 24%        |
